# Supplementary material
Source: ML conference proceedings conference paper supplement (https://openaccess.thecvf.com/content/ICCV2023/html/Guo_Automatic_Network_Pruning_ICCV_2023_paper.html)
Supplement: Supplementary file 1 [file Guo_Automatic_Network_Pruning_ICCV_2023_supplemental.pdf]

# Automatic Network Pruning via Hilbert-Schmidt Independence Criterion Lasso under Information Bottleneck Principle Supplementary Material

Song Guo<sup>1†</sup>, Lei Zhang<sup>1†</sup>, Xiawu Zheng<sup>1,2†</sup>, Yan Wang<sup>3</sup>, Yuchao Li<sup>4</sup>,  
Fei Chao<sup>1</sup>, Chenglin Wu<sup>5</sup>, Shengchuan Zhang<sup>1</sup>, Rongrong Ji<sup>1,2,6,7\*</sup>

<sup>1</sup>Key Laboratory of Multimedia Trusted Perception and Efficient Computing, Ministry of Education of China, Department of Artificial Intelligence, School of Informatics, Xiamen University. <sup>2</sup>Peng Cheng Laboratory. <sup>3</sup>Samsara Inc. <sup>4</sup>Alibaba Group.

<sup>5</sup>Deep Wisdom Inc. <sup>6</sup>Institute of Artificial Intelligence, Xiamen University. <sup>7</sup>Fujian Engineering Research Center of Trusted Artificial Intelligence Analysis and Application, Xiamen University.

{guosong, leizhang}@stu.xmu.edu.cn, {fchao, zsc\_2016, rrji}@xmu.edu.cn  
zhengxw01@pcl.ac.cn, grapeot@outlook.com, xiamenlyc@gmail.com, alexanderwu@fuzhi.ai

| Model     | Method             | Pruned Top-1 Acc.(diff.) | FLOPs ↓    |
|-----------|--------------------|--------------------------|------------|
| VGG-16    | CPGMI[3]           | 73.53%(-0.27%)           | 37%        |
|           | CPMC[5]            | 73.01%(-0.79%)           | 48%        |
|           | PGMPF[1]           | 73.45%(-0.35%)           | 48%        |
|           | PGMPF-SFP[1]       | 73.66%(-0.14%)           | 48%        |
|           | <b>APIB (ours)</b> | <b>73.89%(+0.09%)</b>    | <b>48%</b> |
| ResNet-56 | NSPPR[6]           | 72.46%(-0.03%)           | 25%        |
|           | DLRFC[2]           | 71.41%(+0.27%)           | 26%        |
|           | <b>APIB (ours)</b> | <b>73.31%(+0.79%)</b>    | <b>26%</b> |
|           | PGMPF[1]           | 70.21%(-2.71%)           | 53%        |
|           | <b>APIB (ours)</b> | <b>70.89%(-1.63%)</b>    | <b>53%</b> |

Table 1. Pruning results of VGG-16 and ResNet-56 on CIFAR-100.

## 1. Overview

In this supplementary material, we provide the experimental results about CIFAR-100 and time cost comparison.

## 2. Experiments on CIFAR-100

We conduct experiments on CIFAR-100 using ResNet-56 and VGG-16, the results show that APIB yield a state-of-the-art performance.

## 3. Time cost comparison

We compare the time cost of APIB and baselines for pruning ResNet50 with a sparsity of 76%. APIB significantly reduces pruning time compared to Hrank and CHIP[4], which calculate rank or channel independence based on feature maps.

| Method | L1 | FPGM | APIB | Hrank | CHIP    |
|--------|----|------|------|-------|---------|
| Time   | 7s | 8s   | 63s  | 9112s | 545618s |

Table 2. Time cost required by APIB and other baselines.

## References

- [1] Linhang Cai, Zhulin An, Chuanguang Yang, Yangchun Yan, and Yongjun Xu. Prior gradient mask guided pruning-aware fine-tuning. In *Proceedings of the AAAI Conference on Artificial Intelligence*, volume 1, 2022.
- [2] Zhiqiang He, Yaguan Qian, Yuqi Wang, Bin Wang, Xiaohui Guan, Zhaoquan Gu, Xiang Ling, Shaoning Zeng, Haijiang Wang, and Wujie Zhou. Filter pruning via feature discrimination in deep neural networks. In *European Conference on Computer Vision*, pages 245–261. Springer, 2022.
- [3] Min Kyu Lee, Seunghyun Lee, Sang Hyuk Lee, and Byung Cheol Song. Channel pruning via gradient of mutual information for light-weight convolutional neural networks. In *2020 IEEE International Conference on Image Processing (ICIP)*, pages 1751–1755. IEEE, 2020.
- [4] Yang Sui, Miao Yin, Yi Xie, Huy Phan, Saman Aliari Zonouz, and Bo Yuan. Chip: Channel independence-based pruning for compact neural networks. *Advances in Neural Information Processing Systems*, 34:24604–24616, 2021.
- [5] Yangchun Yan, Rongzuo Guo, Chao Li, Kang Yang, and Yongjun Xu. Channel pruning via multi-criteria based on weight dependency. In *2021 International Joint Conference on Neural Networks (IJCNN)*, pages 1–8. IEEE, 2021.
- [6] Tao Zhuang, Zhixuan Zhang, Yuheng Huang, Xiaoyi Zeng, Kai Shuang, and Xiang Li. Neuron-level structured pruning using polarization regularizer. *Advances in neural information processing systems*, 33:9865–9877, 2020.

\*Corresponding author.

†Equal contribution.
